# Supplementary material
Source: Springer Nature journal article supplement (https://www.springermedizin.de/resource/supplementary/12979_2007_43_MOESM4_ESM.pdf/9603250)

**A**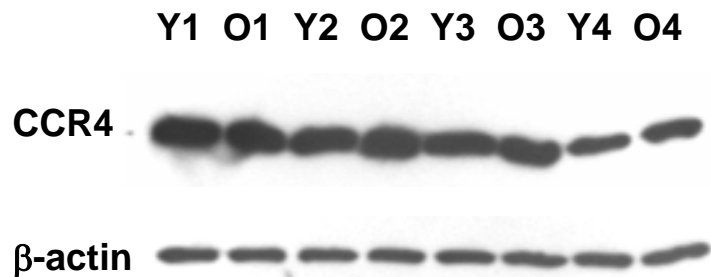**B**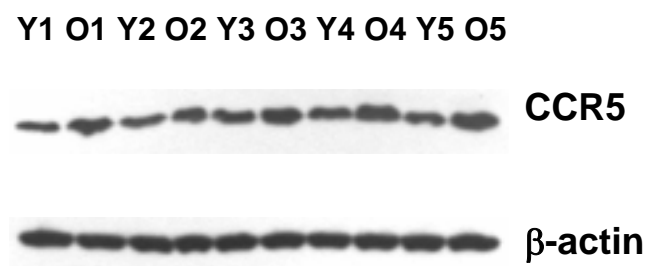**C**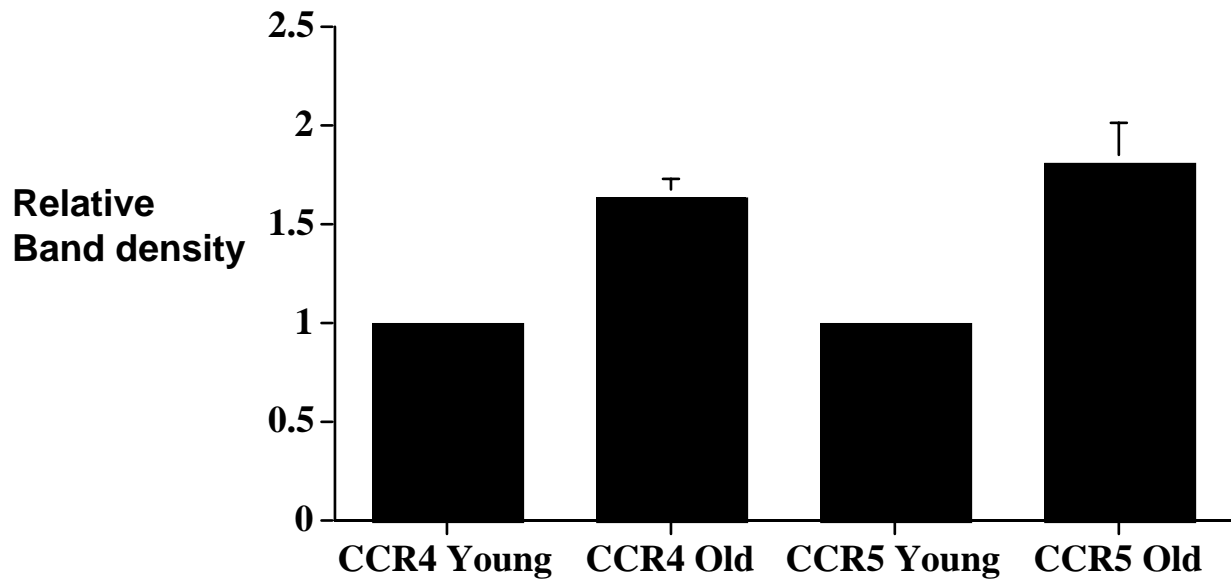

Supplement: MOESM4 [file 9603250]
